# Supplementary material for: Late pregnancy ultrasound parameters identifying fetuses at risk of adverse perinatal outcomes: a protocol for a systematic review of systematic reviews
Source: HighWire-hosted journal article supplement (doi:10.1136/bmjopen-2021-058293), 2022-03-01
Supplement: bmjopen-2021-058293supp001_data_supplement.pdf [file bmjopen-2021-058293supp001_data_supplement.pdf]

## Supplementary material – search strategy

### Database: Embase 1974 to present

- 
- 1 fetus echography/
  - 2 fetal Doppler/
  - 3 ((prenatal or pre-natal or fetal or fetus or foetus or foetal or obstetric or pregnan\* or gestation\* or perinatal or peri-natal) adj4 (ultrasonic or ultrasonograph\* or ultrasound\* or doppler\* or echograph\* or sonograph\*)).ti,ab.
  - 4 1 or 2 or 3
  - 5 meta-analysis.pt. or meta-analysis/ or systematic review/ or meta-analysis as topic/ or "meta analysis (topic)"/ or "systematic review (topic)"/ or exp technology assessment, biomedical/ or ((systematic\* adj3 (review\* or overview\*)) or (methodologic\* adj3 (review\* or overview\*))).ti,ab,kw. or ((quantitative adj3 (review\* or overview\* or synthes\*)) or (research adj3 (integrati\* or overview\*))).ti,ab,kw. or ((integrative adj3 (review\* or overview\*)) or (collaborative adj3 (review\* or overview\*)) or (pool\* adj3 analy\*)).ti,ab,kw. or (data synthes\* or data extraction\* or data abstraction\*).ti,ab,kw. or (handsearch\* or hand search\*).ti,ab,kw. or (mantel haenszel or peto or der simonian or dersimonian or fixed effect\* or latin square\*).ti,ab,kw. or (met analy\* or metanaly\* or technology assessment\* or HTA or HTAs or technology overview\* or technology appraisal\*).ti,ab,kw. or (meta regression\* or metaregression\*).ti,ab,kw. or (meta-analy\* or metaanaly\* or systematic review\* or biomedical technology assessment\* or bio-medical technology assessment\*).mp,hw. or (medline or cochrane or pubmed or medlars or embase or cinahl).ti,ab,hw. or (cochrane or (health adj2 technology assessment) or evidence report).jw. or (comparative adj3 (efficacy or effectiveness)).ti,ab,kw. or (outcomes research or relative effectiveness).ti,ab,kw. or ((indirect or indirect treatment or mixed-treatment) adj comparison\*).ti,ab,kw.
  - 6 4 and 5

### Database: Medline (Ovid MEDLINE® Epub Ahead of Print, In-Process & Other Non-Indexed Citations, Ovid MEDLINE® Daily and Ovid MEDLINE®) 1946 to present

- 
- 2 Ultrasonography, Doppler/
  - 3 ((prenatal or pre-natal or fetal or fetus or foetus or foetal or obstetric or pregnan\* or gestation\* or perinatal or peri-natal) adj4 (ultrasonic or ultrasonograph\* or ultrasound\* or doppler\* or echograph\* or sonograph\*)).ti,ab.
  - 4 1 or 2 or 3
  - 5 (((comprehensive\* or integrative or systematic\*) adj3 (bibliographic\* or review\* or literature)) or (meta-analy\* or metaanaly\* or "research synthesis" or ((information or data) adj3 synthesis) or (data adj2 extract\*))).ti,ab. or (cinahl or (cochrane adj3 trial\*) or embase or medline or psyclit or (psycinfo not "psycinfo database") or pubmed or scopus or "sociological abstracts" or "web of science").ab. or ("cochrane database of systematic reviews" or evidence report technology assessment or evidence report technology assessment summary).jn. or Evidence Report: Technology Assessment\*.jn. or ((review adj5 (rationale or evidence)).ti,ab. and review.pt.) or meta-analysis as topic/ or Meta-Analysis.pt.
  - 6 4 and 5

### Cochrane Database of Systematic Reviews

#### Issue 6 of 12,

- #1 ((prenatal or pre-natal or fetal or fetus or foetus or foetal or obstetric or pregnan\* or gestation\* or perinatal or peri-natal) near/4 (ultrasonic or ultrasonograph\* or ultrasound\* or doppler\* or echograph\* or sonograph\*)):ti,ab,kw

**EBSCO CINAHL**

- 
1. (MH "Ultrasonography, Prenatal")
  2. TI ( ((prenatal or pre-natal or fetal or fetus or foetus or foetal or obstetric or pregnan\* or gestation\* or perinatal or peri-natal) n4 (ultrasonic or ultrasonograph\* or ultrasound\* or doppler\* or echograph\* or sonograph\*)) ) OR AB ( ((prenatal or pre-natal or fetal or fetus or foetus or foetal or obstetric or pregnan\* or gestation\* or perinatal or peri-natal) n4 (ultrasonic or ultrasonograph\* or ultrasound\* or doppler\* or echograph\* or sonograph\*)) )
  3. 1 OR 2
  4. TX ((comprehensive\* or integrative or systematic\*) n3 (bibliographic\* or review\* or literature)) or (meta-analy\* or metaanaly\* or "research synthesis" or ((information or data) n3 synthesis) or (data n2 extract\*) or cinahl or (cochrane n3 trial\*) or embase or medline or psyclit or (psycinfo not "psycinfo database") or pubmed or scopus or "sociological abstracts" or "web of science" or "cochrane database of systematic reviews" or "evidence report technology assessment" or "evidence report" or "technology assessment summary") or (review n5 (rationale or evidence))
  5. 3 AND 4

**Scopus**

-----

((prenatal or pre-natal or fetal or fetus or foetus or foetal or obstetric or pregnan\* or gestation\* or perinatal or peri-natal) w/4 (ultrasonic or ultrasonograph\* or ultrasound\* or doppler\* or echograph\* or sonograph\*))

AND

((comprehensive\* OR integrative OR systematic\*) w/3 (bibliographic\* OR review\* OR literature)) OR meta-analy\* OR metaanaly\* OR "research synthesis" OR ((information OR data) w/3 synthesis) OR (data w/2 extract\*) OR cinahl OR (cochrane w/2 trial\*) OR embase OR medline OR psyclit OR (psycinfo NOT "psycinfo database") OR pubmed OR scopus OR "sociological abstracts" OR "web of science" OR "cochrane database of systematic reviews" OR "evidence report" OR "technology assessment" OR (review w/5 (rationale OR evidence))

**WHO Global Index Medicus**

-----

(tw:(prenatal or pre-natal or fetal or fetus or foetus or foetal or obstetric or pregnan\* or gestation\* or perinatal or peri-natal)) AND (tw:(ultrasonic or ultrasonograph\* or ultrasound\* or doppler\* or echograph\* or sonograph\*)) AND (tw:(((comprehensive\* or integrative or systematic\*) AND (bibliographic\* or review\* or literature)) or (meta-analy\* or metaanaly\*)))
